# Supplementary material for: Modeling of Urinary Microbiota Associated With Cystitis
Source: Front Cell Infect Microbiol. 2021 Mar 16;11:643638. doi: 10.3389/fcimb.2021.643638 (PMC8008076; doi:10.3389/fcimb.2021.643638)
Supplement: Supplementary file 1 [file DataSheet_1.xlsx]

## Sheet: Sheet1
TAXID	LS1	LS2	LS3	LS4	LS5	LS6	LS7	LS8
Otu0001	0	7	0	0	0	0	0	0
Otu0002	0	63	0	0	53	0	8	0
Otu0003	0	0	0	16	0	0	0	0
Otu0004	0	0	0	0	0	3	0	0
Otu0005	0	0	0	0	0	5	0	0
Otu0006	0	0	0	0	0	0	0	0
Otu0007	43	157	15	0	3	0	12	0
Otu0008	0	0	0	0	0	0	0	0
Otu0009	0	227	0	0	0	0	0	0
Otu0010	0	0	0	0	0	0	0	0
Otu0011	0	0	0	0	0	0	0	0
Otu0012	0	0	0	0	0	0	0	0
Otu0013	0	0	0	0	0	0	0	0
Otu0014	0	0	0	0	0	0	0	0
Otu0015	0	26	0	0	116	90	0	0
Otu0016	0	0	44	22	0	37	8	0
Otu0017	0	0	0	20	0	0	0	0
Otu0018	0	92	0	0	0	0	0	0
Otu0019	0	0	34	0	51	127	0	0
Otu0020	0	97	0	18	0	47	9	14
Otu0021	0	65	0	0	0	0	0	0
Otu0022	0	0	12	0	0	0	0	0
Otu0023	7	0	0	0	0	90	0	0
Otu0024	0	0	0	0	0	0	0	0
Otu0025	0	11	0	0	0	0	0	0
Otu0026	0	0	0	0	0	0	0	0
Otu0027	0	79	19	0	110	0	0	75
Otu0028	0	15	0	0	0	0	0	0
Otu0029	0	22	0	0	0	0	0	0
Otu0030	0	108	0	0	0	0	0	0
Otu0031	0	0	0	0	0	0	0	0
Otu0032	0	0	0	15	0	0	0	0
Otu0033	0	0	0	0	0	0	0	0
Otu0034	0	0	0	0	0	0	0	0
Otu0035	0	83	0	0	0	0	0	0
Otu0036	0	0	0	0	0	0	0	0
Otu0037	0	0	0	0	26	0	0	0
Otu0038	0	22	0	0	0	0	0	0
Otu0039	0	60	0	0	0	0	0	0
Otu0040	0	0	0	5	6	47	0	0
Otu0041	0	0	0	0	0	0	0	0
Otu0042	0	0	0	0	0	0	0	0
Otu0043	0	0	0	0	0	0	0	0
Otu0044	47	88	16	10	67	50	11	0
Otu0045	18	79	6	6	0	8	0	5
Otu0046	0	145	0	0	0	111	0	0
Otu0047	11	0	0	0	0	0	0	0
Otu0048	6	0	0	42	0	54	0	0
Otu0049	0	0	0	4	0	0	0	0
Otu0050	0	0	0	0	0	0	0	0
Otu0051	0	0	0	0	0	0	0	0
Otu0052	0	0	0	0	0	0	0	0
Otu0053	0	0	0	0	0	0	0	0
Otu0054	0	0	0	0	0	0	0	0
Otu0055	0	0	0	0	0	0	0	0
Otu0056	0	0	0	0	0	0	9	0
Otu0057	0	0	0	0	0	0	0	0
Otu0058	0	308	0	0	0	0	0	0
Otu0059	0	45	0	0	23	23	0	0
Otu0060	0	83	0	0	0	0	0	0
Otu0061	0	0	0	0	0	0	0	0
Otu0062	0	0	0	0	0	0	0	0
Otu0063	0	0	0	0	0	0	0	0
Otu0064	0	0	0	0	0	0	0	0
Otu0065	0	0	0	35	41	0	0	0
Otu0066	14	3	0	16	0	128	0	0
Otu0067	0	0	0	0	0	0	0	0
Otu0068	0	0	0	4	0	33	0	0
Otu0069	0	0	20	0	0	0	0	0
Otu0070	0	0	0	0	0	0	0	0
Otu0071	0	0	0	37	0	0	0	0
Otu0072	0	0	62	75	0	0	0	0
Otu0073	0	0	0	0	0	0	0	93
Otu0074	0	0	7	27	29	101	0	0
Otu0075	0	0	0	0	0	22	0	0
Otu0076	77	15	0	94	91	323	32	0
Otu0077	0	0	0	0	0	7	0	0
Otu0078	0	0	0	0	0	22	0	0
Otu0079	0	0	0	0	0	5	0	0
Otu0080	0	350	0	0	8	0	18	0
Otu0081	0	50	0	8	0	0	0	0
Otu0082	0	0	0	0	0	0	0	0
Otu0083	0	86	0	58	0	0	0	0
Otu0084	0	0	0	0	0	0	0	0
Otu0085	0	33	0	0	0	0	0	0
Otu0086	0	91	0	0	0	0	0	0
Otu0087	0	0	0	0	0	0	95	0
Otu0088	0	0	0	0	0	0	0	0
Otu0089	24	31	59	44	14	26	34	0
Otu0090	0	0	0	0	0	38	0	0
Otu0091	0	0	0	0	103	0	0	0
Otu0092	0	0	0	0	0	0	0	0
Otu0093	54	0	79	88	60	57	69	0
Otu0094	0	0	0	0	0	0	0	0
Otu0095	0	62	6	0	0	3	0	0
Otu0096	0	0	0	0	0	0	0	0
Otu0097	3	0	4	2	6	0	109	0
Otu0098	0	28	0	0	0	0	44	0
Otu0099	0	0	0	0	0	0	0	0
Otu0100	134	9049	24301	31524	12984	11053	37507	15
Otu0101	0	0	0	0	0	0	0	0
Otu0102	49	89	121	157	73	64	86	12
Otu0103	0	0	0	0	139	0	0	0
Otu0104	0	107	0	34	0	0	0	0
Otu0105	0	0	28	0	0	71	21	0
Otu0106	0	0	0	0	0	0	0	0
Otu0107	0	0	0	0	0	0	8	0
Otu0108	0	47	0	0	0	0	0	0
Otu0109	0	0	0	0	0	0	0	0
Otu0110	0	13	0	0	0	0	0	0
Otu0111	0	0	0	0	0	0	0	0
Otu0112	0	0	0	0	0	0	0	0
Otu0113	0	72	0	0	95	0	0	0
Otu0114	35	181	0	54	0	0	0	0
Otu0115	0	456	0	57	148	96	0	0
Otu0116	0	69	0	49	76	0	0	0
Otu0117	0	0	0	0	0	0	0	0
Otu0118	0	228	0	0	46	0	0	0
Otu0119	0	71	0	0	93	65	0	102
Otu0120	0	0	0	0	106	0	0	0
Otu0121	0	72	0	14	0	0	0	0
Otu0122	0	0	0	0	101	0	0	0
Otu0123	0	0	0	0	76	0	0	0
Otu0124	0	116	0	33	0	0	0	0
Otu0125	0	0	0	0	0	126	0	0
Otu0126	0	34	36	0	0	0	0	0
Otu0127	11	210	0	22	0	184	0	0
Otu0128	0	0	0	0	0	0	0	0
Otu0129	0	98	0	0	0	0	0	0
Otu0130	0	0	0	0	0	0	0	0
Otu0131	0	0	0	0	0	0	0	0
Otu0132	0	21	0	0	0	0	9	0
Otu0133	19	0	0	0	0	0	0	0
Otu0134	0	0	0	0	0	0	0	0
Otu0135	0	0	0	0	38	0	0	0
Otu0136	0	154	0	0	113	71	10	0
Otu0137	0	105	15	0	37	0	0	0
Otu0138	0	0	0	0	0	0	0	0
Otu0139	0	176	14	46	92	76	0	0
Otu0140	10	148	0	11	0	0	11	0
Otu0141	0	0	0	0	0	68	0	0
Otu0142	2	253	0	56	0	306	0	0
Otu0143	0	237	0	25	68	28	13	75
Otu0144	0	0	0	0	0	0	27	0
Otu0145	0	0	0	0	0	0	0	0
Otu0146	0	104	0	0	0	0	0	0
Otu0147	0	0	0	0	0	0	0	0
Otu0148	0	57	0	0	0	0	0	0
Otu0149	0	0	0	0	0	0	0	0
Otu0150	0	0	0	0	0	0	0	0
Otu0151	13	75	0	0	0	0	0	0
Otu0152	0	0	0	0	0	0	0	0
Otu0153	0	98	0	27	0	32	0	0
Otu0154	0	107	0	0	0	0	0	0
Otu0155	0	0	0	0	0	0	0	0
Otu0156	0	0	0	0	0	0	0	0
Otu0157	0	0	0	0	0	0	0	0
Otu0158	0	287	58	0	0	0	5	0
Otu0159	0	3	0	0	0	0	0	0
Otu0160	0	136	0	0	0	0	0	0
Otu0161	0	15	0	0	0	0	0	0
Otu0162	0	0	0	0	0	0	0	0
Otu0163	23	0	9	0	0	10	0	0
Otu0164	0	0	0	0	0	0	0	0
Otu0165	11	7	17	58	53	162	19	0
Otu0166	0	0	0	0	0	0	0	0
Otu0167	0	0	0	0	0	0	0	0
Otu0168	0	0	0	0	0	0	0	0
Otu0169	0	0	0	12	0	0	0	0
Otu0170	0	61	0	37	147	129	0	75
Otu0171	0	0	0	32	0	0	0	0
Otu0172	0	0	0	0	0	0	0	0
Otu0173	0	73	0	0	0	0	0	0
Otu0174	0	0	0	0	0	0	0	0
Otu0175	0	0	0	0	0	12	0	0
Otu0176	0	0	0	0	0	7	0	0
Otu0177	0	0	0	0	9	0	0	0
Otu0178	0	0	0	0	0	0	0	0
Otu0179	0	94	0	0	0	0	0	0
Otu0180	0	0	0	0	0	0	0	0
Otu0181	0	0	0	38	0	0	0	0
Otu0182	0	0	0	0	0	0	0	186
Otu0183	0	0	0	3	0	36	0	0
Otu0184	78	15	16	38	40	168	19	17
Otu0185	0	0	0	0	0	0	0	0
Otu0186	0	0	0	0	0	0	0	0
Otu0187	0	78	0	0	0	59	0	0
Otu0188	0	0	0	0	0	11	0	0
Otu0189	0	0	0	0	0	0	0	0
Otu0190	0	0	0	0	0	99	0	0
Otu0191	0	4	0	0	0	78	8	0
Otu0192	0	0	0	0	0	0	0	0
Otu0193	0	0	0	0	0	0	0	0
Otu0194	0	0	0	18	69	0	0	0
Otu0195	0	0	32	0	79	0	0	0
Otu0196	0	0	0	0	0	29	0	0
Otu0197	0	83	157	0	0	85	0	73
Otu0198	0	0	0	0	0	0	13	0
Otu0199	0	0	31	0	44	0	0	156
Otu0200	0	108	0	9	0	0	0	0
Otu0201	0	0	0	10	0	0	0	0
Otu0202	16	0	0	0	8	67	0	0
Otu0203	0	0	0	0	0	0	0	0
Otu0204	0	0	0	0	0	5	0	0
Otu0205	0	0	0	0	0	0	0	0
Otu0206	0	0	0	0	0	0	0	0
Otu0207	0	0	0	0	0	0	0	0
Otu0208	0	0	0	0	0	0	0	0
Otu0209	0	0	0	0	0	0	0	0
Otu0210	0	0	0	0	0	0	0	13
Otu0211	0	0	0	0	0	109	0	0
Otu0212	20224	215	66	114	29	107	25	260
Otu0213	0	0	0	0	0	0	0	0
Otu0214	0	0	0	0	0	0	0	0
Otu0215	0	0	0	0	0	0	0	0
Otu0216	0	0	0	0	0	0	0	0
Otu0217	0	0	0	0	0	0	0	0
Otu0218	0	0	0	0	0	0	0	0
Otu0219	0	0	0	0	0	0	0	0
Otu0220	0	0	0	0	0	0	0	0
Otu0221	188	32	28	23	0	27	16	0
Otu0222	93	17	16	15	15	23	0	0
Otu0223	0	0	0	0	0	0	0	0
Otu0224	0	0	0	0	0	92	0	0
Otu0225	0	0	0	10	0	0	0	0
Otu0226	0	45	0	6	46	37	0	115
Otu0227	0	75	0	0	0	0	0	0
Otu0228	0	102	30	0	98	266	0	0
Otu0229	0	99	0	44	0	80	0	0
Otu0230	0	0	0	15	124	0	0	186
Otu0231	0	0	0	0	0	0	0	114
Otu0232	0	0	0	0	0	125	0	0
Otu0233	61	3001	2442	981	3506	2936	216	3663
Otu0234	160	0	0	0	0	0	0	0
Otu0235	61	801	683	192	700	852	0	1036
Otu0236	0	108	86	0	86	0	12	176
Otu0237	0	14	0	0	0	0	0	0
Otu0238	0	0	0	33	59	176	0	114
Otu0239	0	0	0	0	0	111	0	0
Otu0240	0	0	0	27	0	0	0	0
Otu0241	0	59	0	0	0	56	0	112
Otu0242	0	0	0	0	0	6	0	0
Otu0243	0	0	0	0	0	0	0	0
Otu0244	0	0	0	0	0	0	0	0
Otu0245	0	0	0	0	0	0	0	0
Otu0246	0	0	0	0	0	8	0	0
Otu0247	0	0	0	0	0	0	0	0
Otu0248	0	0	0	0	0	8	0	0
Otu0249	0	0	0	0	0	16	0	0
